# Supplementary material for: Decline of the world's saline lakes
Source: Springer Nature journal article supplement (doi:10.1038/ngeo3052), 2017-10-23
Supplement: 41561_2017_BFngeo3052_MOESM1_ESM.pdf [file 41561_2017_BFngeo3052_MOESM1_ESM.pdf]

In the format provided by the authors and unedited.

# Decline of the world's saline lakes

**Wayne A. Wurtsbaugh, Craig Miller, Sarah E. Null, R. Justin DeRose, Peter Wilcock,  
Maura Hahnenberger, Frank Howe and Johnnie Moore**

Decline of the world's saline lakes. Wurtsbaugh et al. Nature Geoscience

Volumes and percent of maximum volumes of saline lakes shown in Figure 2.

| Aral Sea |                                   |                     | Great Salt Lake |                                   |                     | Owens Lake |                                   |                     | Lake Urmia |                                   |                     | Walker Lake, NV |                                   |                     | Dead Sea |                                   |                     |
|----------|-----------------------------------|---------------------|-----------------|-----------------------------------|---------------------|------------|-----------------------------------|---------------------|------------|-----------------------------------|---------------------|-----------------|-----------------------------------|---------------------|----------|-----------------------------------|---------------------|
| Year     | Average Volume (km <sup>3</sup> ) | % of maximum volume | Year            | Average Volume (km <sup>3</sup> ) | % of maximum volume | Year       | Average Volume (km <sup>3</sup> ) | % of maximum volume | Year       | Average Volume (km <sup>3</sup> ) | % of maximum volume | Year            | Average Volume (km <sup>3</sup> ) | % of maximum volume | Year     | Average Volume (km <sup>3</sup> ) | % of maximum volume |
| 1910     | 1031.7                            | 97.6%               | 1847            | 18.82                             | 52.8%               | 1856       | 2.956                             | 100.0%              | 1910       | 12.78                             | 39.6%               | 1882            | 11.14                             | 100.0%              | 1837     | 149.7                             | 94.7%               |
| 1911     | 1052.1                            | 99.5%               | 1848            | 19.61                             | 55.0%               | 1872       | 2.956                             | 100.0%              | 1920       | 11.49                             | 35.6%               | 1908            | 10.71                             | 96.2%               | 1841     | 150.2                             | 95.0%               |
| 1912     | 1054.0                            | 99.7%               | 1849            | 19.74                             | 55.4%               | 1878       | 2.956                             | 100.0%              | 1930       | 15.92                             | 49.3%               | 1909            | 10.76                             | 96.6%               | 1845     | 148.9                             | 94.2%               |
| 1913     | 1047.0                            | 99.0%               | 1850            | 19.81                             | 57.4%               | 1884       | 1.869                             | 63.2%               | 1940       | 12.78                             | 39.6%               | 1910            | 10.46                             | 93.9%               | 1849     | 149.3                             | 94.5%               |
| 1914     | 1048.3                            | 99.2%               | 1851            | 20.83                             | 60.3%               | 1894       | 1.869                             | 63.2%               | 1950       | 19.69                             | 61.0%               | 1911            | 10.80                             | 96.9%               | 1853     | 149.7                             | 94.7%               |
| 1915     | 1050.8                            | 99.4%               | 1852            | 22.38                             | 62.8%               | 1902       | 1.207                             | 40.8%               | 1960       | 14.11                             | 43.7%               | 1912            | 10.63                             | 95.4%               | 1857     | 151.8                             | 96.0%               |
| 1916     | 1043.1                            | 98.7%               | 1853            | 24.76                             | 65.5%               | 1903       | 1.029                             | 34.8%               | 1965       | 12.78                             | 39.6%               | 1913            | 10.46                             | 93.9%               | 1861     | 150.2                             | 95.0%               |
| 1917     | 1027.8                            | 97.2%               | 1854            | 24.26                             | 67.4%               | 1904       | 0.861                             | 29.1%               | 1970       | 25.20                             | 78.0%               | 1914            | 10.80                             | 96.9%               | 1865     | 149.3                             | 94.7%               |
| 1918     | 1002.5                            | 94.8%               | 1855            | 24.54                             | 67.9%               | 1905       | 0.635                             | 21.5%               | 1975       | 24.68                             | 76.4%               | 1915            | 10.76                             | 96.6%               | 1869     | 151.4                             | 95.8%               |
| 1919     | 1003.7                            | 94.9%               | 1856            | 24.31                             | 66.4%               | 1906       | 0.697                             | 23.6%               | 1980       | 20.66                             | 64.0%               | 1916            | 10.78                             | 96.8%               | 1873     | 151.0                             | 95.5%               |
| 1920     | 999.9                             | 94.6%               | 1857            | 23.27                             | 64.2%               | 1907       | 0.947                             | 32.0%               | 1985       | 18.74                             | 58.0%               | 1917            | 10.80                             | 96.9%               | 1878     | 150.2                             | 95.0%               |
| 1921     | 1010.1                            | 95.5%               | 1858            | 21.97                             | 61.6%               | 1908       | 1.135                             | 38.4%               | 1990       | 22.14                             | 68.6%               | 1918            | 10.63                             | 95.4%               | 1882     | 152.7                             | 96.6%               |
| 1922     | 1018.3                            | 96.3%               | 1859            | 20.49                             | 58.8%               | 1910       | 1.181                             | 39.9%               | 1995       | 32.29                             | 100.0%              | 1919            | 10.38                             | 93.2%               | 1886     | 157.6                             | 99.7%               |
| 1923     | 1033.6                            | 97.8%               | 1860            | 19.77                             | 58.3%               | 1911       | 1.286                             | 43.5%               | 1996       | 30.40                             | 94.2%               | 1920            | 10.24                             | 92.0%               | 1890     | 152.7                             | 96.6%               |
| 1924     | 1035.5                            | 97.9%               | 1861            | 19.42                             | 58.5%               | 1912       | 1.330                             | 45.0%               | 1997       | 28.33                             | 87.7%               | 1921            | 10.06                             | 90.3%               | 1894     | 158.1                             | 100.0%              |
| 1925     | 1043.1                            | 98.7%               | 1862            | 22.31                             | 60.9%               | 1913       | 1.256                             | 42.5%               | 1998       | 27.34                             | 84.7%               | 1922            | 9.98                              | 89.6%               | 1898     | 159.3                             | 100.8%              |
| 1926     | 1034.8                            | 97.9%               | 1863            | 22.38                             | 64.7%               | 1913       | 1.256                             | 42.5%               | 1999       | 21.00                             | 65.1%               | 1923            | 9.82                              | 88.1%               | 1902     | 157.6                             | 99.7%               |
| 1927     | 1025.3                            | 97.0%               | 1864            | 24.77                             | 70.1%               | 1914       | 0.056                             | 1.9%                | 2000       | 16.06                             | 49.8%               | 1924            | 9.58                              | 86.0%               | 1906     | 157.2                             | 99.4%               |
| 1928     | 1022.7                            | 96.7%               | 1865            | 26.48                             | 75.1%               | 1945       | 0.044                             | 1.5%                | 2001       | 11.96                             | 37.0%               | 1925            | 9.42                              | 84.6%               | 1910     | 158.1                             | 100.0%              |
| 1929     | 1024.7                            | 96.9%               | 1866            | 29.01                             | 81.7%               | 1950       | 0.017                             | 0.6%                | 2002       | 10.19                             | 31.6%               | 1926            | 9.00                              | 80.8%               | 1914     | 158.1                             | 100.0%              |
| 1930     | 1024.7                            | 96.9%               | 1867            | 31.37                             | 87.8%               | 1955       | 0.012                             | 0.4%                | 2003       | 11.24                             | 34.8%               | 1927            | 8.89                              | 79.8%               | 1918     | 158.9                             | 100.5%              |
| 1931     | 1016.4                            | 96.1%               | 1868            | 34.14                             | 92.4%               | 1960       | 0.022                             | 0.7%                | 2004       | 10.65                             | 33.0%               | 1928            | 8.45                              | 75.8%               | 1922     | 158.1                             | 100.0%              |
| 1932     | 1029.7                            | 97.4%               | 1869            | 35.59                             | 95.6%               | 1965       | 0.003                             | 0.1%                | 2005       | 9.75                              | 30.2%               | 1929            | 8.25                              | 74.1%               | 1927     | 157.2                             | 99.4%               |
| 1933     | 1036.1                            | 98.0%               | 1870            | 34.70                             | 98.5%               | 1970       | 0.213                             | 7.2%                | 2006       | 7.93                              | 24.6%               | 1930            | 8.06                              | 72.3%               | 1931     | 158.5                             | 100.2%              |
| 1934     | 1038.0                            | 98.2%               | 1871            | 34.68                             | 99.9%               | 1975       | 0.007                             | 0.2%                | 2007       | 7.74                              | 24.0%               | 1931            | 7.80                              | 70.0%               | 1935     | 156.4                             | 98.9%               |
| 1935     | 1047.6                            | 99.1%               | 1872            | 36.60                             | 100.0%              | 1980       | 0.031                             | 1.1%                | 2008       | 5.55                              | 17.2%               | 1932            | 7.61                              | 68.3%               | 1939     | 154.7                             | 97.9%               |
| 1936     | 1045.1                            | 98.8%               | 1873            | 36.69                             | 99.2%               | 1985       | 0.012                             | 0.4%                | 2009       | 3.78                              | 11.7%               | 1933            | 7.40                              | 66.4%               | 1943     | 154.3                             | 97.6%               |
| 1937     | 1038.0                            | 98.2%               | 1874            | 35.69                             | 99.1%               | 1990       | 0.017                             | 0.6%                | 2010       | 3.11                              | 9.6%                | 1934            | 7.13                              | 64.0%               | 1947     | 154.7                             | 97.9%               |
| 1938     | 1029.7                            | 97.4%               | 1875            | 33.33                             | 97.9%               | 1995       | 0.022                             | 0.7%                | 2011       | 2.18                              | 6.7%                | 1935            | 6.92                              | 62.1%               | 1951     | 155.1                             | 98.1%               |
| 1939     | 1023.4                            | 96.8%               | 1876            | 34.44                             | 95.7%               | 2015       | 0.006                             | 0.2%                | 2012       | 1.43                              | 4.4%                | 1936            | 6.74                              | 60.5%               | 1955     | 154.3                             | 97.6%               |
| 1940     | 1010.7                            | 95.6%               | 1877            | 34.48                             | 92.0%               |            |                                   |                     | 2013       | 0.92                              | 2.9%                | 1937            | 6.56                              | 58.9%               | 1959     | 152.7                             | 96.6%               |
| 1941     | 1010.7                            | 95.6%               | 1878            | 32.68                             | 88.8%               |            |                                   |                     | 2017       | 2.50                              | 7.7%                | 1938            | 6.65                              | 59.7%               | 1963     | 150.6                             | 95.2%               |
| 1942     | 1013.2                            | 95.8%               | 1879            | 29.15                             | 84.7%               |            |                                   |                     |            |                                   |                     | 1939            | 6.73                              | 60.4%               | 1967     | 148.9                             | 94.2%               |
| 1943     | 1018.3                            | 96.3%               | 1880            | 27.55                             | 80.4%               |            |                                   |                     |            |                                   |                     | 1940            | 6.52                              | 58.5%               | 1971     | 148.9                             | 94.2%               |
| 1944     | 1013.2                            | 95.8%               | 1881            | 27.28                             | 76.3%               |            |                                   |                     |            |                                   |                     | 1941            | 6.41                              | 57.5%               | 1976     | 146.8                             | 92.9%               |
| 1945     | 1015.8                            | 96.1%               | 1882            | 26.77                             | 74.6%               |            |                                   |                     |            |                                   |                     | 1942            | 6.39                              | 57.4%               | 1980     | 143.1                             | 90.5%               |
| 1946     | 1025.3                            | 97.0%               | 1883            | 25.40                             | 75.3%               |            |                                   |                     |            |                                   |                     | 1943            | 6.35                              | 57.0%               | 1984     | 140.2                             | 88.7%               |
| 1947     | 1018.3                            | 96.3%               | 1884            | 26.12                             | 76.6%               |            |                                   |                     |            |                                   |                     | 1944            | 6.19                              | 55.5%               | 1988     | 138.1                             | 87.4%               |
| 1948     | 1003.7                            | 94.9%               | 1885            | 28.69                             | 77.8%               |            |                                   |                     |            |                                   |                     | 1945            | 6.08                              | 54.6%               | 1992     | 139.4                             | 88.1%               |
| 1949     | 1011.3                            | 95.7%               | 1886            | 29.67                             | 78.6%               |            |                                   |                     |            |                                   |                     | 1946            | 6.05                              | 54.3%               | 1996     | 138.7                             | 87.7%               |
| 1950     | 1020.2                            | 96.5%               | 1887            | 28.88                             | 77.5%               |            |                                   |                     |            |                                   |                     | 1947            | 5.89                              | 52.9%               | 2000     | 129.7                             | 82.0%               |
| 1951     | 1013.9                            | 95.9%               | 1888            | 26.75                             | 74.6%               |            |                                   |                     |            |                                   |                     | 1948            | 5.70                              | 51.2%               | 2002     | 126.8                             | 80.2%               |
| 1952     | 1012.0                            | 95.7%               | 1889            | 24.21                             | 70.9%               |            |                                   |                     |            |                                   |                     | 1949            | 5.48                              | 49.2%               | 2004     | 124.8                             | 78.9%               |
| 1953     | 1022.7                            | 96.7%               | 1890            | 23.47                             | 67.1%               |            |                                   |                     |            |                                   |                     | 1950            | 5.29                              | 47.5%               | 2006     | 122.2                             | 77.3%               |
| 1954     | 1039.3                            | 98.3%               | 1891            | 23.07                             | 64.4%               |            |                                   |                     |            |                                   |                     | 1951            | 5.18                              | 46.5%               | 2008     | 119.3                             | 75.5%               |
| 1955     | 1041.9                            | 98.5%               | 1892            | 22.13                             | 63.1%               |            |                                   |                     |            |                                   |                     | 1952            | 5.17                              | 46.4%               | 2009     | 117.7                             | 74.5%               |
| 1956     | 1045.7                            | 98.9%               | 1893            | 22.01                             | 61.8%               |            |                                   |                     |            |                                   |                     | 1954            | 4.99                              | 44.8%               |          |                                   |                     |
| 1957     | 1043.8                            | 98.7%               | 1894            | 21.95                             | 60.4%               |            |                                   |                     |            |                                   |                     | 1955            | 4.83                              | 43.3%               |          |                                   |                     |
| 1958     | 1041.9                            | 98.5%               | 1895            | 21.04                             | 59.6%               |            |                                   |                     |            |                                   |                     | 1956            | 4.80                              | 43.1%               |          |                                   |                     |
| 1959     | 1049.5                            | 99.3%               | 1896            | 20.51                             | 58.7%               |            |                                   |                     |            |                                   |                     | 1957            | 4.77                              | 42.8%               |          |                                   |                     |
| 1960     | 1057.2                            | 100.0%              | 1897            | 20.80                             | 57.5%               |            |                                   |                     |            |                                   |                     | 1958            | 4.70                              | 42.2%               |          |                                   |                     |
| 1961     | 1050.2                            | 99.3%               | 1898            | 20.40                             | 56.6%               |            |                                   |                     |            |                                   |                     | 1959            | 4.63                              | 41.6%               |          |                                   |                     |
| 1962     | 1029.7                            | 97.4%               | 1899            | 19.77                             | 55.2%               |            |                                   |                     |            |                                   |                     | 1960            | 4.40                              | 39.5%               |          |                                   |                     |
| 1963     | 1006.9                            | 95.2%               | 1900            | 19.45                             | 52.4%               |            |                                   |                     |            |                                   |                     | 1961            | 4.24                              | 38.0%               |          |                                   |                     |
| 1964     | 999.3                             | 94.5%               | 1901            | 18.09                             | 49.7%               |            |                                   |                     |            |                                   |                     | 1962            | 4.13                              | 37.0%               |          |                                   |                     |
| 1965     | 988.0                             | 93.4%               | 1902            | 15.84                             | 47.5%               |            |                                   |                     |            |                                   |                     | 1963            | 4.01                              | 36.0%               |          |                                   |                     |
| 1966     | 961.7                             | 91.0%               | 1903            | 15.46                             | 45.2%               |            |                                   |                     |            |                                   |                     | 1964            | 3.93                              | 35.3%               |          |                                   |                     |
| 1967     | 941.9                             | 89.1%               | 1904            | 15.90                             | 43.9%               |            |                                   |                     |            |                                   |                     | 1965            | 3.83                              | 34.4%               |          |                                   |                     |
| 1968     | 921.6                             | 87.2%               | 1905            | 15.36                             | 45.3%               |            |                                   |                     |            |                                   |                     | 1966            | 3.79                              | 34.1%               |          |                                   |                     |
| 1969     | 924.6                             | 87.5%               | 1906            | 15.71                             | 47.6%               |            |                                   |                     |            |                                   |                     | 1967            | 3.76                              | 33.8%               |          |                                   |                     |
| 1970     | 933.2                             | 88.3%               | 1907            | 18.31                             | 50.7%               |            |                                   |                     |            |                                   |                     | 1968            | 3.77                              | 33.9%               |          |                                   |                     |
| 1971     | 910.5                             | 86.1%               | 1908            | 19.63                             | 55.1%               |            |                                   |                     |            |                                   |                     | 1969            | 3.92                              | 35.2%               |          |                                   |                     |
| 1972     | 879.0                             | 83.1%               | 1909            | 21.48                             | 58.8%               |            |                                   |                     |            |                                   |                     | 1970            | 3.98                              | 35.7%               |          |                                   |                     |
| 1973     | 859.9                             | 81.3%               | 1910            | 23.13                             | 60.9%               |            |                                   |                     |            |                                   |                     | 1971            | 3.88                              | 34.9%               |          |                                   |                     |
| 1974     | 837.9                             | 79.3%               | 1911            | 22.41                             | 62.4%               |            |                                   |                     |            |                                   |                     | 1972            | 3.75                              | 33.7%               |          |                                   |                     |
| 1975     | 789.0                             | 74.6%               | 1912            | 22.01                             | 63.2%               |            |                                   |                     |            |                                   |                     | 1973            | 3.66                              | 32.8%               |          |                                   |                     |
| 1976     | 746.9                             | 70.7%               | 1913            | 22.22                             | 62.8%               |            |                                   |                     |            |                                   |                     | 1974            | 3.59                              | 32.2%               |          |                                   |                     |
| 1977     | 711.5                             | 67.3%               | 1914            | 22.89                             | 62.4%               |            |                                   |                     |            |                                   |                     | 1975            | 3.53                              | 31.7%               |          |                                   |                     |
| 1978     | 680.6                             | 64.4%               | 1915            | 22.42                             | 62.7%               |            |                                   |                     |            |                                   |                     | 1976            | 3.44                              | 30.9%               |          |                                   |                     |
| 1979     | 648.2                             | 61.3%               | 1916            | 21.79                             | 63.1%               |            |                                   |                     |            |                                   |                     | 1977            | 3.32                              | 29.8%               |          |                                   |                     |
| 1980     | 612.1                             | 57.9%               | 1917            | 22.51                             | 62.4%               |            |                                   |                     |            |                                   |                     | 1978            | 3.14                              | 28.2%               |          |                                   |                     |
| 1981     | 583.5                             | 55.2%               | 1918            | 22.94                             | 61.4%               |            |                                   |                     |            |                                   |                     | 1979            | 3.02                              | 27.1%               |          |                                   |                     |
| 1982     | 545.0                             | 51.6%               | 1919            | 21.56                             | 61.6%               |            |                                   |                     |            |                                   |                     | 1980            | 3.01                              | 27.0%               |          |                                   |                     |
| 1983     | 505.7                             | 47.8%               | 1920            | 20.77                             | 62.3%               |            |                                   |                     |            |                                   |                     | 1981            | 3.00                              | 26.9%               |          |                                   |                     |
| 1984     | 469.7                             | 44.4%               | 1921            | 22.16                             | 63.5%               |            |                                   |                     |            |                                   |                     | 1982            | 2.97                              | 26.6%               |          |                                   |                     |
| 1985     | 434.9                             | 41.1%               | 1922            | 23.76                             | 65.3%               |            |                                   |                     |            |                                   |                     | 1983            | 3.42                              | 30.7%               |          |                                   |                     |







**Figure 3a data. Gauged discharges in the Blacksmith Fork River and estimated flows in the Bear River based on DeRose et al. 2015**

| <b>Bear River, Utah, flow based on tree-ring estimates</b> |                                                       |                  | <b>Blacksmith Fork River, Utah</b> |                                             |                  |
|------------------------------------------------------------|-------------------------------------------------------|------------------|------------------------------------|---------------------------------------------|------------------|
| Year                                                       | Estimated mean annual discharge (m <sup>3</sup> /sec) | Fraction of mean | Year                               | Mean annual discharge (m <sup>3</sup> /sec) | Fraction of mean |
| 1878                                                       | 3.93                                                  | 0.67             | .                                  | .                                           | .                |
| 1879                                                       | 3.26                                                  | 1.02             | .                                  | .                                           | .                |
| 1880                                                       | 4.97                                                  | 0.87             | .                                  | .                                           | .                |
| 1881                                                       | 4.23                                                  | 0.81             | .                                  | .                                           | .                |
| 1882                                                       | 3.95                                                  | 0.90             | .                                  | .                                           | .                |
| 1883                                                       | 4.41                                                  | 1.10             | .                                  | .                                           | .                |
| 1884                                                       | 5.39                                                  | 1.27             | .                                  | .                                           | .                |
| 1885                                                       | 6.22                                                  | 1.02             | .                                  | .                                           | .                |
| 1886                                                       | 4.99                                                  | 0.90             | .                                  | .                                           | .                |
| 1887                                                       | 4.38                                                  | 0.57             | .                                  | .                                           | .                |
| 1888                                                       | 2.78                                                  | 0.48             | .                                  | .                                           | .                |
| 1889                                                       | 2.36                                                  | 0.87             | .                                  | .                                           | .                |
| 1890                                                       | 4.24                                                  | 0.66             | .                                  | .                                           | .                |
| 1891                                                       | 3.21                                                  | 0.67             | .                                  | .                                           | .                |
| 1892                                                       | 3.28                                                  | 0.78             | .                                  | .                                           | .                |
| 1893                                                       | 3.82                                                  | 0.92             | .                                  | .                                           | .                |
| 1894                                                       | 4.51                                                  | 0.94             | .                                  | .                                           | .                |
| 1895                                                       | 4.58                                                  | 0.91             | .                                  | .                                           | .                |
| 1896                                                       | 4.43                                                  | 0.95             | .                                  | .                                           | .                |
| 1897                                                       | 4.64                                                  | 1.05             | .                                  | .                                           | .                |
| 1898                                                       | 5.14                                                  | 1.04             | .                                  | .                                           | .                |
| 1899                                                       | 5.10                                                  | 0.80             | .                                  | .                                           | .                |
| 1900                                                       | 3.89                                                  | 0.96             | .                                  | .                                           | .                |
| 1901                                                       | 4.69                                                  | 0.74             | .                                  | .                                           | .                |
| 1902                                                       | 3.64                                                  | 0.73             | .                                  | .                                           | .                |
| 1903                                                       | 3.58                                                  | 1.03             | .                                  | .                                           | .                |
| 1904                                                       | 5.06                                                  | 0.68             | .                                  | .                                           | .                |
| 1905                                                       | 3.34                                                  | 1.15             | .                                  | .                                           | .                |
| 1906                                                       | 5.63                                                  | 1.34             | .                                  | .                                           | .                |
| 1907                                                       | 6.57                                                  | 1.21             | .                                  | .                                           | .                |
| 1908                                                       | 5.94                                                  | 1.14             | .                                  | .                                           | .                |
| 1909                                                       | 5.55                                                  | 0.87             | .                                  | .                                           | .                |
| 1910                                                       | 4.26                                                  | 0.80             | .                                  | .                                           | .                |
| 1911                                                       | 3.90                                                  | 0.87             | .                                  | .                                           | .                |
| 1912                                                       | 4.24                                                  | 0.82             | .                                  | .                                           | .                |
| 1913                                                       | 4.02                                                  | 1.14             | .                                  | .                                           | .                |
| 1914                                                       | 5.56                                                  | 0.80             | 1914                               | 4.72                                        | 1.45             |
| 1915                                                       | 3.93                                                  | 1.07             | 1915                               | 2.45                                        | 0.76             |
| 1916                                                       | 5.25                                                  | 0.82             | 1916                               | 4.82                                        | 1.48             |
| 1917                                                       | 3.99                                                  | 0.68             | 1917                               | 5.99                                        | 1.84             |

**Figure 3a data. Gauged discharges in the Blacksmith Fork River and estimated flows in the Bear River based on DeRose et al. 2015**

| <b>Bear River, Utah, flow based on tree-ring estimates</b> |                                                       |                  | <b>Blacksmith Fork River, Utah</b> |                                             |                  |
|------------------------------------------------------------|-------------------------------------------------------|------------------|------------------------------------|---------------------------------------------|------------------|
| Year                                                       | Estimated mean annual discharge (m <sup>3</sup> /sec) | Fraction of mean | Year                               | Mean annual discharge (m <sup>3</sup> /sec) | Fraction of mean |
| 1918                                                       | 3.32                                                  | 0.59             | 1918                               | 2.88                                        | 0.89             |
| 1919                                                       | 2.87                                                  | 0.88             | 1919                               | 2.76                                        | 0.85             |
| 1920                                                       | 4.30                                                  | 1.11             | 1920                               | 4.53                                        | 1.39             |
| 1921                                                       | 5.42                                                  | 1.04             | 1921                               | 6.18                                        | 1.90             |
| 1922                                                       | 5.08                                                  | 1.17             | 1922                               | 5.44                                        | 1.67             |
| 1923                                                       | 5.72                                                  | 0.89             | 1923                               | 5.40                                        | 1.66             |
| 1924                                                       | 4.35                                                  | 0.89             | 1924                               | 3.37                                        | 1.04             |
| 1925                                                       | 4.35                                                  | 0.67             | 1925                               | 3.37                                        | 1.04             |
| 1926                                                       | 3.29                                                  | 0.87             | 1926                               | 2.53                                        | 0.78             |
| 1927                                                       | 4.24                                                  | 0.94             | 1927                               | 3.57                                        | 1.10             |
| 1928                                                       | 4.60                                                  | 0.95             | 1928                               | 3.52                                        | 1.08             |
| 1929                                                       | 4.66                                                  | 0.76             | 1929                               | 3.47                                        | 1.07             |
| 1930                                                       | 3.73                                                  | 0.49             | 1930                               | 2.46                                        | 0.76             |
| 1931                                                       | 2.41                                                  | 0.90             | 1931                               | 1.57                                        | 0.48             |
| 1932                                                       | 4.39                                                  | 0.61             | 1932                               | 4.23                                        | 1.30             |
| 1933                                                       | 3.00                                                  | 0.40             | 1933                               | 2.84                                        | 0.87             |
| 1934                                                       | 1.98                                                  | 0.71             | 1934                               | 1.47                                        | 0.45             |
| 1935                                                       | 3.48                                                  | 0.84             | 1935                               | 2.11                                        | 0.65             |
| 1936                                                       | 4.09                                                  | 0.94             | 1936                               | 4.52                                        | 1.39             |
| 1937                                                       | 4.59                                                  | 0.90             | 1937                               | 3.37                                        | 1.04             |
| 1938                                                       | 4.41                                                  | 0.85             | 1938                               | 3.48                                        | 1.07             |
| 1939                                                       | 4.14                                                  | 0.69             | 1939                               | 2.29                                        | 0.70             |
| 1940                                                       | 3.38                                                  | 0.95             | 1940                               | 1.70                                        | 0.52             |
| 1941                                                       | 4.66                                                  | 0.90             | 1941                               | 1.49                                        | 0.46             |
| 1942                                                       | 4.38                                                  | 1.22             | 1942                               | 1.82                                        | 0.56             |
| 1943                                                       | 5.97                                                  | 1.22             | 1943                               | 3.48                                        | 1.07             |
| 1944                                                       | 5.97                                                  | 0.95             | 1944                               | 2.29                                        | 0.71             |
| 1945                                                       | 4.66                                                  | 1.09             | 1945                               | 2.94                                        | 0.90             |
| 1946                                                       | 5.33                                                  | 1.40             | 1946                               | 5.02                                        | 1.55             |
| 1947                                                       | 6.84                                                  | 1.03             | 1947                               | 3.03                                        | 0.93             |
| 1948                                                       | 5.03                                                  | 1.17             | 1948                               | 4.05                                        | 1.25             |
| 1949                                                       | 5.72                                                  | 1.39             | 1949                               | 3.86                                        | 1.19             |
| 1950                                                       | 6.81                                                  | 1.33             | 1950                               | 5.70                                        | 1.75             |
| 1951                                                       | 6.48                                                  | 1.24             | 1951                               | 5.28                                        | 1.62             |
| 1952                                                       | 6.04                                                  | 1.05             | 1952                               | 5.78                                        | 1.78             |
| 1953                                                       | 5.11                                                  | 0.69             | 1953                               | 3.32                                        | 1.02             |
| 1954                                                       | 3.37                                                  | 0.58             | 1954                               | 2.59                                        | 0.80             |
| 1955                                                       | 2.86                                                  | 0.98             | 1955                               | 2.87                                        | 0.88             |
| 1956                                                       | 4.79                                                  | 1.28             | 1956                               | 4.29                                        | 1.32             |
| 1957                                                       | 6.26                                                  | 0.91             | 1957                               | 4.06                                        | 1.25             |

**Figure 3a data. Gauged discharges in the Blacksmith Fork River and estimated flows in the Bear River based on DeRose et al. 2015**

| <b>Bear River, Utah, flow based on tree-ring estimates</b> |                                                       |                  | <b>Blacksmith Fork River, Utah</b> |                                             |                  |
|------------------------------------------------------------|-------------------------------------------------------|------------------|------------------------------------|---------------------------------------------|------------------|
| Year                                                       | Estimated mean annual discharge (m <sup>3</sup> /sec) | Fraction of mean | Year                               | Mean annual discharge (m <sup>3</sup> /sec) | Fraction of mean |
| 1958                                                       | 4.43                                                  | 0.94             | 1958                               | 3.72                                        | 1.14             |
| 1959                                                       | 4.62                                                  | 0.87             | 1959                               | 2.55                                        | 0.78             |
| 1960                                                       | 4.27                                                  | 0.54             | 1960                               | 2.57                                        | 0.79             |
| 1961                                                       | 2.66                                                  | 1.00             | 1961                               | 1.62                                        | 0.50             |
| 1962                                                       | 4.91                                                  | 1.03             | 1962                               | 3.48                                        | 1.07             |
| 1963                                                       | 5.04                                                  | 1.16             | 1963                               | 2.43                                        | 0.75             |
| 1964                                                       | 5.69                                                  | 1.13             | 1964                               | 2.98                                        | 0.92             |
| 1965                                                       | 5.54                                                  | 0.80             | 1965                               | 4.62                                        | 1.42             |
| 1966                                                       | 3.92                                                  | 1.28             | 1966                               | 3.03                                        | 0.93             |
| 1967                                                       | 6.24                                                  | 1.23             | 1967                               | 4.12                                        | 1.27             |
| 1968                                                       | 6.01                                                  | 1.25             | 1968                               | 3.28                                        | 1.01             |
| 1969                                                       | 6.13                                                  | 1.38             | 1969                               | 3.71                                        | 1.14             |
| 1970                                                       | 6.76                                                  | 1.43             | 1970                               | 3.15                                        | 0.97             |
| 1971                                                       | 7.00                                                  | 1.47             | 1971                               | 6.69                                        | 2.06             |
| 1972                                                       | 7.19                                                  | 1.44             | 1972                               | 6.63                                        | 2.04             |
| 1973                                                       | 7.06                                                  | 1.38             | 1973                               | 3.95                                        | 1.21             |
| 1974                                                       | 6.77                                                  | 1.45             | 1974                               | 5.05                                        | 1.55             |
| 1975                                                       | 7.07                                                  | 1.11             | 1975                               | 4.57                                        | 1.41             |
| 1976                                                       | 5.45                                                  | 0.73             | 1976                               | 3.91                                        | 1.20             |
| 1977                                                       | 3.56                                                  | 1.21             | 1977                               | 1.80                                        | 0.55             |
| 1978                                                       | 5.92                                                  | 0.71             | 1978                               | 3.53                                        | 1.08             |
| 1979                                                       | 3.45                                                  | 1.11             | 1979                               | 3.05                                        | 0.94             |
| 1980                                                       | 5.43                                                  | 1.18             | 1980                               | 4.33                                        | 1.33             |
| 1981                                                       | 5.77                                                  | 1.35             | 1981                               | 2.23                                        | 0.69             |
| 1982                                                       | 6.58                                                  | 1.52             | 1982                               | 5.52                                        | 1.70             |
| 1983                                                       | 7.42                                                  | 1.51             | 1983                               | 6.26                                        | 1.93             |
| 1984                                                       | 7.37                                                  | 1.51             | 1984                               | 8.45                                        | 2.60             |
| 1985                                                       | 7.37                                                  | 1.71             | 1985                               | 5.18                                        | 1.59             |
| 1986                                                       | 8.36                                                  | 1.07             | 1986                               | 7.77                                        | 2.39             |
| 1987                                                       | 5.22                                                  | 0.89             | 1987                               | 3.00                                        | 0.92             |
| 1988                                                       | 4.35                                                  | 1.12             | 1988                               | 2.08                                        | 0.64             |
| 1989                                                       | 5.47                                                  | 0.82             | 1989                               | 2.39                                        | 0.73             |
| 1990                                                       | 4.00                                                  | 1.05             | 1990                               | 1.53                                        | 0.47             |
| 1991                                                       | 5.14                                                  | 0.86             | 1991                               | 2.02                                        | 0.62             |
| 1992                                                       | 4.19                                                  | 1.12             | 1992                               | 1.41                                        | 0.43             |
| 1993                                                       | 5.49                                                  | 0.80             | 1993                               | 3.58                                        | 1.10             |
| 1994                                                       | 3.93                                                  | 1.31             | 1994                               | 2.39                                        | 0.74             |
| 1995                                                       | 6.41                                                  | 1.09             | 1995                               | 3.72                                        | 1.14             |
| 1996                                                       | 5.31                                                  | 1.23             | 1996                               | 4.37                                        | 1.34             |
| 1997                                                       | 6.03                                                  | 1.43             | Missing from USGS Record           |                                             |                  |



**Figure 3a data. Gauged discharges in the Blacksmith Fork River and estimated flows in the Bear River based on DeRose et al. 2015**

| <b>Bear River, Utah, flow based on tree-ring estimates</b> |                                                       |                  | <b>Blacksmith Fork River, Utah</b> |                                             |                  |
|------------------------------------------------------------|-------------------------------------------------------|------------------|------------------------------------|---------------------------------------------|------------------|
| Year                                                       | Estimated mean annual discharge (m <sup>3</sup> /sec) | Fraction of mean | Year                               | Mean annual discharge (m <sup>3</sup> /sec) | Fraction of mean |
| 1998                                                       | 6.99                                                  | 1.26             | Missing from USGS Record           |                                             |                  |
| 1999                                                       | 6.17                                                  | 0.91             | Missing from USGS Record           |                                             |                  |
| 2000                                                       | 4.44                                                  | 0.78             | 2000                               | 2.55                                        | 0.78             |
| 2001                                                       | 3.83                                                  | 0.72             | 2001                               | 1.95                                        | 0.60             |
| 2002                                                       | 3.52                                                  | 0.82             | 2002                               | 1.91                                        | 0.59             |
| 2003                                                       | 4.02                                                  | 0.77             | 2003                               | 1.77                                        | 0.54             |
| 2004                                                       | 3.77                                                  | 1.07             | 2004                               | 1.64                                        | 0.50             |
| 2005                                                       | 5.23                                                  | 0.89             | 2005                               | 3.69                                        | 1.13             |
| 2006                                                       | 4.35                                                  | 0.84             | 2006                               | 4.33                                        | 1.33             |
| 2007                                                       | 4.09                                                  | 0.99             | 2007                               | 2.14                                        | 0.66             |
| 2008                                                       | 4.86                                                  | 1.30             | 2008                               | 2.67                                        | 0.82             |
| 2009                                                       | 6.36                                                  | 1.16             | 2009                               | 3.14                                        | 0.97             |
| 2010                                                       | 5.66                                                  | 1.41             | 2010                               | 2.20                                        | 0.68             |
| 2011                                                       | 6.90                                                  | 0.76             | 2011                               | 7.32                                        | 2.25             |
| 2012                                                       | 3.73                                                  | 0.71             | 2012                               | 2.69                                        | 0.83             |
| 2013                                                       | 3.45                                                  | 0.00             | 2013                               | 1.82                                        | 0.56             |
|                                                            |                                                       |                  | 2014                               | 2.34                                        | 0.72             |

**Decline of the world's saline lakes. Fig. 3b data.**

**Estimated depletions (water loss) from human development in Great Salt Lake basin  
Utah Division of Water Resources, Salt Lake City**

| Year | Water Use (depletions) (Billion m <sup>3</sup> /year) |           |           |         |         | Imports (Billion m <sup>3</sup> /year) | Net Depletion (use - imports) (Billion m <sup>3</sup> /year) |
|------|-------------------------------------------------------|-----------|-----------|---------|---------|----------------------------------------|--------------------------------------------------------------|
|      | Agriculture                                           | Municipal | Reservoir | Mineral | Wetland |                                        |                                                              |
| 1850 | 0.00                                                  | 0.00      | 0.00      | 0.00    | 0.00    | 0.00                                   | 0.00                                                         |
| 1851 | 0.03                                                  | 0.00      | 0.00      | 0.00    | 0.00    | 0.00                                   | 0.03                                                         |
| 1852 | 0.06                                                  | 0.00      | 0.00      | 0.00    | 0.00    | 0.00                                   | 0.06                                                         |
| 1853 | 0.09                                                  | 0.00      | 0.00      | 0.00    | 0.00    | 0.00                                   | 0.09                                                         |
| 1854 | 0.12                                                  | 0.00      | 0.00      | 0.00    | 0.00    | 0.00                                   | 0.12                                                         |
| 1855 | 0.15                                                  | 0.00      | 0.00      | 0.00    | 0.00    | 0.00                                   | 0.15                                                         |
| 1856 | 0.17                                                  | 0.00      | 0.00      | 0.00    | 0.00    | 0.00                                   | 0.18                                                         |
| 1857 | 0.20                                                  | 0.00      | 0.00      | 0.00    | 0.00    | 0.00                                   | 0.21                                                         |
| 1858 | 0.23                                                  | 0.00      | 0.00      | 0.00    | 0.00    | 0.00                                   | 0.23                                                         |
| 1859 | 0.26                                                  | 0.00      | 0.00      | 0.00    | 0.00    | 0.00                                   | 0.26                                                         |
| 1860 | 0.28                                                  | 0.00      | 0.00      | 0.00    | 0.00    | 0.00                                   | 0.29                                                         |
| 1861 | 0.31                                                  | 0.00      | 0.00      | 0.00    | 0.00    | 0.00                                   | 0.31                                                         |
| 1862 | 0.33                                                  | 0.00      | 0.00      | 0.00    | 0.00    | 0.00                                   | 0.34                                                         |
| 1863 | 0.36                                                  | 0.00      | 0.00      | 0.00    | 0.00    | 0.00                                   | 0.36                                                         |
| 1864 | 0.38                                                  | 0.00      | 0.00      | 0.00    | 0.00    | 0.00                                   | 0.39                                                         |
| 1865 | 0.41                                                  | 0.01      | 0.00      | 0.00    | 0.00    | 0.00                                   | 0.41                                                         |
| 1866 | 0.43                                                  | 0.01      | 0.00      | 0.00    | 0.00    | 0.00                                   | 0.44                                                         |
| 1867 | 0.46                                                  | 0.01      | 0.00      | 0.00    | 0.00    | 0.00                                   | 0.46                                                         |
| 1868 | 0.48                                                  | 0.01      | 0.00      | 0.00    | 0.00    | 0.00                                   | 0.49                                                         |
| 1869 | 0.50                                                  | 0.01      | 0.00      | 0.00    | 0.00    | 0.00                                   | 0.51                                                         |
| 1870 | 0.52                                                  | 0.01      | 0.00      | 0.00    | 0.00    | 0.00                                   | 0.54                                                         |
| 1871 | 0.55                                                  | 0.01      | 0.00      | 0.00    | 0.00    | 0.00                                   | 0.56                                                         |
| 1872 | 0.57                                                  | 0.01      | 0.00      | 0.00    | 0.00    | 0.00                                   | 0.58                                                         |
| 1873 | 0.59                                                  | 0.01      | 0.00      | 0.00    | 0.00    | 0.00                                   | 0.60                                                         |
| 1874 | 0.61                                                  | 0.01      | 0.00      | 0.00    | 0.00    | 0.00                                   | 0.63                                                         |
| 1875 | 0.64                                                  | 0.02      | 0.00      | 0.00    | 0.00    | 0.00                                   | 0.65                                                         |
| 1876 | 0.66                                                  | 0.01      | 0.00      | 0.00    | 0.00    | 0.00                                   | 0.67                                                         |
| 1877 | 0.68                                                  | 0.01      | 0.00      | 0.00    | 0.00    | 0.00                                   | 0.70                                                         |
| 1878 | 0.70                                                  | 0.01      | 0.00      | 0.00    | 0.00    | 0.00                                   | 0.72                                                         |
| 1879 | 0.72                                                  | 0.02      | 0.00      | 0.00    | 0.00    | 0.00                                   | 0.74                                                         |
| 1880 | 0.75                                                  | 0.02      | 0.00      | 0.00    | 0.00    | 0.00                                   | 0.76                                                         |
| 1881 | 0.77                                                  | 0.02      | 0.00      | 0.00    | 0.00    | 0.00                                   | 0.78                                                         |
| 1882 | 0.79                                                  | 0.02      | 0.00      | 0.00    | 0.00    | 0.00                                   | 0.80                                                         |
| 1883 | 0.81                                                  | 0.02      | 0.00      | 0.00    | 0.00    | 0.00                                   | 0.83                                                         |
| 1884 | 0.83                                                  | 0.02      | 0.00      | 0.00    | 0.00    | 0.00                                   | 0.85                                                         |
| 1885 | 0.85                                                  | 0.02      | 0.00      | 0.00    | 0.00    | 0.00                                   | 0.87                                                         |
| 1886 | 0.87                                                  | 0.01      | 0.00      | 0.00    | 0.00    | 0.00                                   | 0.89                                                         |
| 1887 | 0.89                                                  | 0.01      | 0.00      | 0.00    | 0.00    | 0.00                                   | 0.90                                                         |
| 1888 | 0.91                                                  | 0.02      | 0.00      | 0.00    | 0.00    | 0.00                                   | 0.92                                                         |

| Year | Water Use (depletions) (Billion m <sup>3</sup> /year) |           |           |         |         | Imports (Billion m <sup>3</sup> /year) | Net Depletion (use - imports) (Billion m <sup>3</sup> /year) |
|------|-------------------------------------------------------|-----------|-----------|---------|---------|----------------------------------------|--------------------------------------------------------------|
|      | Agriculture                                           | Municipal | Reservoir | Mineral | Wetland |                                        |                                                              |
| 1889 | 0.93                                                  | 0.02      | 0.00      | 0.00    | 0.00    | 0.00                                   | 0.95                                                         |
| 1890 | 0.95                                                  | 0.02      | 0.00      | 0.00    | 0.00    | 0.00                                   | 0.97                                                         |
| 1891 | 0.97                                                  | 0.02      | 0.00      | 0.00    | 0.00    | 0.00                                   | 0.99                                                         |
| 1892 | 0.99                                                  | 0.02      | 0.00      | 0.00    | 0.00    | 0.00                                   | 1.01                                                         |
| 1893 | 1.01                                                  | 0.02      | 0.00      | 0.00    | 0.00    | 0.00                                   | 1.03                                                         |
| 1894 | 1.03                                                  | 0.02      | 0.00      | 0.00    | 0.00    | 0.00                                   | 1.05                                                         |
| 1895 | 1.05                                                  | 0.02      | 0.00      | 0.00    | 0.00    | 0.00                                   | 1.07                                                         |
| 1896 | 1.07                                                  | 0.02      | 0.00      | 0.00    | 0.00    | 0.00                                   | 1.09                                                         |
| 1897 | 1.09                                                  | 0.02      | 0.01      | 0.00    | 0.00    | 0.00                                   | 1.12                                                         |
| 1898 | 1.10                                                  | 0.02      | 0.01      | 0.00    | 0.00    | 0.00                                   | 1.13                                                         |
| 1899 | 1.12                                                  | 0.02      | 0.01      | 0.00    | 0.00    | 0.00                                   | 1.15                                                         |
| 1900 | 1.14                                                  | 0.02      | 0.01      | 0.00    | 0.00    | 0.00                                   | 1.17                                                         |
| 1901 | 1.16                                                  | 0.02      | 0.01      | 0.00    | 0.02    | 0.00                                   | 1.21                                                         |
| 1902 | 1.18                                                  | 0.02      | 0.01      | 0.00    | 0.02    | 0.00                                   | 1.23                                                         |
| 1903 | 1.20                                                  | 0.02      | 0.01      | 0.00    | 0.03    | 0.00                                   | 1.25                                                         |
| 1904 | 1.22                                                  | 0.02      | 0.01      | 0.00    | 0.03    | 0.00                                   | 1.28                                                         |
| 1905 | 1.24                                                  | 0.02      | 0.01      | 0.00    | 0.03    | 0.00                                   | 1.30                                                         |
| 1906 | 1.25                                                  | 0.02      | 0.01      | 0.00    | 0.03    | 0.07                                   | 1.24                                                         |
| 1907 | 1.27                                                  | 0.02      | 0.01      | 0.00    | 0.03    | 0.07                                   | 1.26                                                         |
| 1908 | 1.29                                                  | 0.02      | 0.01      | 0.00    | 0.03    | 0.07                                   | 1.27                                                         |
| 1909 | 1.30                                                  | 0.02      | 0.01      | 0.00    | 0.03    | 0.07                                   | 1.29                                                         |
| 1910 | 1.32                                                  | 0.03      | 0.01      | 0.00    | 0.04    | 0.07                                   | 1.32                                                         |
| 1911 | 1.34                                                  | 0.03      | 0.01      | 0.00    | 0.04    | 0.07                                   | 1.34                                                         |
| 1912 | 1.35                                                  | 0.02      | 0.00      | 0.00    | 0.04    | 0.07                                   | 1.35                                                         |
| 1913 | 1.37                                                  | 0.03      | 0.00      | 0.00    | 0.04    | 0.07                                   | 1.37                                                         |
| 1914 | 1.39                                                  | 0.03      | 0.00      | 0.00    | 0.04    | 0.07                                   | 1.39                                                         |
| 1915 | 1.40                                                  | 0.02      | 0.00      | 0.00    | 0.04    | 0.07                                   | 1.40                                                         |
| 1916 | 1.42                                                  | 0.03      | 0.00      | 0.00    | 0.04    | 0.07                                   | 1.42                                                         |
| 1917 | 1.43                                                  | 0.02      | 0.00      | 0.00    | 0.04    | 0.07                                   | 1.43                                                         |
| 1918 | 1.45                                                  | 0.03      | 0.00      | 0.00    | 0.04    | 0.07                                   | 1.45                                                         |
| 1919 | 1.45                                                  | 0.02      | 0.01      | 0.00    | 0.04    | 0.07                                   | 1.45                                                         |
| 1920 | 1.45                                                  | 0.02      | 0.01      | 0.00    | 0.04    | 0.07                                   | 1.45                                                         |
| 1921 | 1.45                                                  | 0.03      | 0.01      | 0.00    | 0.04    | 0.07                                   | 1.45                                                         |
| 1922 | 1.44                                                  | 0.02      | 0.01      | 0.00    | 0.04    | 0.07                                   | 1.45                                                         |
| 1923 | 1.44                                                  | 0.03      | 0.01      | 0.00    | 0.04    | 0.07                                   | 1.44                                                         |
| 1924 | 1.43                                                  | 0.03      | 0.01      | 0.00    | 0.04    | 0.07                                   | 1.43                                                         |
| 1925 | 1.42                                                  | 0.03      | 0.01      | 0.00    | 0.04    | 0.07                                   | 1.43                                                         |
| 1926 | 1.41                                                  | 0.03      | 0.01      | 0.00    | 0.04    | 0.07                                   | 1.42                                                         |
| 1927 | 1.40                                                  | 0.03      | 0.01      | 0.00    | 0.04    | 0.07                                   | 1.42                                                         |
| 1928 | 1.40                                                  | 0.03      | 0.01      | 0.00    | 0.04    | 0.07                                   | 1.41                                                         |
| 1929 | 1.39                                                  | 0.04      | 0.01      | 0.00    | 0.04    | 0.07                                   | 1.41                                                         |
| 1930 | 1.39                                                  | 0.04      | 0.01      | 0.00    | 0.05    | 0.07                                   | 1.41                                                         |
| 1931 | 1.38                                                  | 0.04      | 0.01      | 0.00    | 0.10    | 0.07                                   | 1.46                                                         |

| Year | Water Use (depletions) (Billion m <sup>3</sup> /year) |           |           |         |         | Imports (Billion m <sup>3</sup> /year) | Net Depletion (use - imports) (Billion m <sup>3</sup> /year) |
|------|-------------------------------------------------------|-----------|-----------|---------|---------|----------------------------------------|--------------------------------------------------------------|
|      | Agriculture                                           | Municipal | Reservoir | Mineral | Wetland |                                        |                                                              |
| 1932 | 1.37                                                  | 0.04      | 0.01      | 0.00    | 0.10    | 0.07                                   | 1.46                                                         |
| 1933 | 1.37                                                  | 0.04      | 0.02      | 0.00    | 0.10    | 0.06                                   | 1.47                                                         |
| 1934 | 1.36                                                  | 0.05      | 0.02      | 0.00    | 0.12    | 0.03                                   | 1.52                                                         |
| 1935 | 1.36                                                  | 0.05      | 0.02      | 0.00    | 0.12    | 0.05                                   | 1.49                                                         |
| 1936 | 1.35                                                  | 0.05      | 0.02      | 0.00    | 0.12    | 0.05                                   | 1.49                                                         |
| 1937 | 1.35                                                  | 0.06      | 0.02      | 0.00    | 0.13    | 0.06                                   | 1.49                                                         |
| 1938 | 1.34                                                  | 0.06      | 0.02      | 0.00    | 0.14    | 0.07                                   | 1.50                                                         |
| 1939 | 1.34                                                  | 0.06      | 0.02      | 0.00    | 0.14    | 0.08                                   | 1.49                                                         |
| 1940 | 1.34                                                  | 0.06      | 0.02      | 0.00    | 0.17    | 0.06                                   | 1.53                                                         |
| 1941 | 1.34                                                  | 0.07      | 0.02      | 0.00    | 0.17    | 0.05                                   | 1.54                                                         |
| 1942 | 1.34                                                  | 0.07      | 0.02      | 0.00    | 0.17    | 0.06                                   | 1.53                                                         |
| 1943 | 1.34                                                  | 0.07      | 0.03      | 0.00    | 0.17    | 0.07                                   | 1.54                                                         |
| 1944 | 1.34                                                  | 0.07      | 0.03      | 0.00    | 0.17    | 0.07                                   | 1.54                                                         |
| 1945 | 1.34                                                  | 0.07      | 0.03      | 0.00    | 0.17    | 0.06                                   | 1.56                                                         |
| 1946 | 1.35                                                  | 0.07      | 0.03      | 0.00    | 0.17    | 0.08                                   | 1.54                                                         |
| 1947 | 1.35                                                  | 0.08      | 0.03      | 0.00    | 0.17    | 0.07                                   | 1.56                                                         |
| 1948 | 1.35                                                  | 0.08      | 0.03      | 0.00    | 0.17    | 0.08                                   | 1.56                                                         |
| 1949 | 1.36                                                  | 0.08      | 0.03      | 0.00    | 0.17    | 0.08                                   | 1.57                                                         |
| 1950 | 1.36                                                  | 0.08      | 0.03      | 0.00    | 0.17    | 0.08                                   | 1.58                                                         |
| 1951 | 1.37                                                  | 0.09      | 0.03      | 0.00    | 0.17    | 0.08                                   | 1.58                                                         |
| 1952 | 1.38                                                  | 0.09      | 0.03      | 0.00    | 0.18    | 0.06                                   | 1.61                                                         |
| 1953 | 1.38                                                  | 0.09      | 0.03      | 0.00    | 0.18    | 0.09                                   | 1.60                                                         |
| 1954 | 1.39                                                  | 0.10      | 0.03      | 0.00    | 0.18    | 0.13                                   | 1.57                                                         |
| 1955 | 1.40                                                  | 0.10      | 0.03      | 0.00    | 0.18    | 0.09                                   | 1.62                                                         |
| 1956 | 1.40                                                  | 0.11      | 0.03      | 0.00    | 0.18    | 0.12                                   | 1.60                                                         |
| 1957 | 1.41                                                  | 0.11      | 0.03      | 0.00    | 0.18    | 0.11                                   | 1.63                                                         |
| 1958 | 1.42                                                  | 0.12      | 0.03      | 0.00    | 0.18    | 0.10                                   | 1.65                                                         |
| 1959 | 1.43                                                  | 0.12      | 0.03      | 0.00    | 0.18    | 0.12                                   | 1.64                                                         |
| 1960 | 1.44                                                  | 0.13      | 0.03      | 0.00    | 0.18    | 0.13                                   | 1.65                                                         |
| 1961 | 1.45                                                  | 0.13      | 0.03      | 0.00    | 0.18    | 0.09                                   | 1.71                                                         |
| 1962 | 1.46                                                  | 0.14      | 0.03      | 0.00    | 0.18    | 0.12                                   | 1.70                                                         |
| 1963 | 1.47                                                  | 0.14      | 0.03      | 0.00    | 0.18    | 0.10                                   | 1.73                                                         |
| 1964 | 1.48                                                  | 0.15      | 0.04      | 0.00    | 0.18    | 0.11                                   | 1.74                                                         |
| 1965 | 1.48                                                  | 0.15      | 0.04      | 0.00    | 0.18    | 0.09                                   | 1.76                                                         |
| 1966 | 1.48                                                  | 0.15      | 0.05      | 0.00    | 0.18    | 0.12                                   | 1.75                                                         |
| 1967 | 1.48                                                  | 0.15      | 0.05      | 0.00    | 0.18    | 0.10                                   | 1.77                                                         |
| 1968 | 1.48                                                  | 0.16      | 0.06      | 0.00    | 0.18    | 0.08                                   | 1.79                                                         |
| 1969 | 1.48                                                  | 0.16      | 0.06      | 0.00    | 0.18    | 0.08                                   | 1.80                                                         |
| 1970 | 1.48                                                  | 0.16      | 0.06      | 0.00    | 0.18    | 0.12                                   | 1.77                                                         |
| 1971 | 1.48                                                  | 0.17      | 0.06      | 0.00    | 0.18    | 0.10                                   | 1.78                                                         |
| 1972 | 1.48                                                  | 0.17      | 0.06      | 0.00    | 0.18    | 0.13                                   | 1.76                                                         |
| 1973 | 1.48                                                  | 0.17      | 0.06      | 0.00    | 0.18    | 0.09                                   | 1.80                                                         |
| 1974 | 1.48                                                  | 0.17      | 0.06      | 0.00    | 0.18    | 0.10                                   | 1.79                                                         |

| Year | Water Use (depletions) (Billion m <sup>3</sup> /year) |           |           |         |         | Imports (Billion m <sup>3</sup> /year) | Net Depletion (use - imports) (Billion m <sup>3</sup> /year) |
|------|-------------------------------------------------------|-----------|-----------|---------|---------|----------------------------------------|--------------------------------------------------------------|
|      | Agriculture                                           | Municipal | Reservoir | Mineral | Wetland |                                        |                                                              |
| 1975 | 1.48                                                  | 0.18      | 0.06      | 0.01    | 0.18    | 0.09                                   | 1.81                                                         |
| 1976 | 1.48                                                  | 0.18      | 0.06      | 0.01    | 0.18    | 0.12                                   | 1.79                                                         |
| 1977 | 1.48                                                  | 0.18      | 0.06      | 0.01    | 0.18    | 0.10                                   | 1.82                                                         |
| 1978 | 1.48                                                  | 0.18      | 0.05      | 0.02    | 0.18    | 0.10                                   | 1.81                                                         |
| 1979 | 1.48                                                  | 0.19      | 0.06      | 0.02    | 0.18    | 0.13                                   | 1.80                                                         |
| 1980 | 1.48                                                  | 0.19      | 0.06      | 0.02    | 0.18    | 0.09                                   | 1.84                                                         |
| 1981 | 1.48                                                  | 0.19      | 0.06      | 0.03    | 0.18    | 0.11                                   | 1.83                                                         |
| 1982 | 1.48                                                  | 0.19      | 0.06      | 0.03    | 0.18    | 0.07                                   | 1.87                                                         |
| 1983 | 1.48                                                  | 0.20      | 0.06      | 0.04    | 0.18    | 0.01                                   | 1.94                                                         |
| 1984 | 1.48                                                  | 0.20      | 0.06      | 0.04    | 0.18    | 0.02                                   | 1.94                                                         |
| 1985 | 1.48                                                  | 0.20      | 0.06      | 0.04    | 0.18    | 0.07                                   | 1.90                                                         |
| 1986 | 1.48                                                  | 0.20      | 0.06      | 0.00    | 0.18    | 0.07                                   | 1.86                                                         |
| 1987 | 1.48                                                  | 0.21      | 0.07      | 0.00    | 0.18    | 0.14                                   | 1.79                                                         |
| 1988 | 1.48                                                  | 0.21      | 0.07      | 0.00    | 0.18    | 0.26                                   | 1.68                                                         |
| 1989 | 1.46                                                  | 0.21      | 0.07      | 0.06    | 0.18    | 0.19                                   | 1.79                                                         |
| 1990 | 1.51                                                  | 0.21      | 0.07      | 0.08    | 0.18    | 0.14                                   | 1.93                                                         |
| 1991 | 1.24                                                  | 0.21      | 0.05      | 0.03    | 0.18    | 0.14                                   | 1.58                                                         |
| 1992 | 1.40                                                  | 0.21      | 0.07      | 0.10    | 0.18    | 0.17                                   | 1.79                                                         |
| 1993 | 0.79                                                  | 0.21      | 0.04      | 0.08    | 0.18    | 0.15                                   | 1.16                                                         |
| 1994 | 1.40                                                  | 0.21      | 0.08      | 0.09    | 0.18    | 0.14                                   | 1.82                                                         |
| 1995 | 0.77                                                  | 0.21      | 0.04      | 0.13    | 0.18    | 0.11                                   | 1.23                                                         |
| 1996 | 1.25                                                  | 0.21      | 0.07      | 0.17    | 0.18    | 0.12                                   | 1.77                                                         |
| 1997 | 0.78                                                  | 0.21      | 0.04      | 0.10    | 0.18    | 0.12                                   | 1.20                                                         |
| 1998 | 0.81                                                  | 0.21      | 0.04      | 0.07    | 0.18    | 0.12                                   | 1.21                                                         |
| 1999 | 1.10                                                  | 0.21      | 0.06      | 0.15    | 0.18    | 0.13                                   | 1.57                                                         |
| 2000 | 1.60                                                  | 0.21      | 0.08      | 0.19    | 0.18    | 0.14                                   | 2.13                                                         |
| 2001 | 1.67                                                  | 0.23      | 0.08      | 0.19    | 0.18    | 0.16                                   | 2.18                                                         |
| 2002 | 1.38                                                  | 0.23      | 0.07      | 0.19    | 0.18    | 0.17                                   | 1.89                                                         |
| 2003 | 1.51                                                  | 0.21      | 0.08      | 0.24    | 0.18    | 0.16                                   | 2.07                                                         |
| 2004 | 1.07                                                  | 0.21      | 0.06      | 0.19    | 0.18    | 0.18                                   | 1.54                                                         |
| 2005 | 0.57                                                  | 0.22      | 0.04      | 0.15    | 0.18    | 0.16                                   | 1.00                                                         |
| 2006 | 1.17                                                  | 0.22      | 0.06      | 0.19    | 0.18    | 0.12                                   | 1.70                                                         |
| 2007 | 1.56                                                  | 0.22      | 0.08      | 0.40    | 0.18    | 0.16                                   | 2.29                                                         |
| 2008 | 1.35                                                  | 0.22      | 0.06      | 0.13    | 0.18    | 0.14                                   | 1.81                                                         |
| 2009 | 1.04                                                  | 0.22      | 0.05      | 0.23    | 0.18    | 0.14                                   | 1.59                                                         |
| 2010 | 1.36                                                  | 0.22      | 0.06      | 0.23    | 0.18    | 0.16                                   | 1.89                                                         |
| 2011 | 0.70                                                  | 0.22      | 0.03      | 0.20    | 0.18    | 0.19                                   | 1.14                                                         |
| 2012 | 1.47                                                  | 0.22      | 0.08      | 0.29    | 0.18    | 0.20                                   | 2.04                                                         |
| 2013 | 1.39                                                  | 0.22      | 0.07      | 0.28    | 0.18    | 0.14                                   | 1.99                                                         |

## Decline of the world's saline lakes

**Data for Figure 3c.** Measured elevations in Gilbert Bay (data of U.S. Geological Survey) of Great Salt Lake and estimated natural lake elevations in the absence of water use for human consumption.

| Year | Observed elevations in Gilbert Bay (m) | Modeled natural lake elevations for Gilbert Bay (m) |
|------|----------------------------------------|-----------------------------------------------------|
| 1847 | 1280.10                                | 1280.10                                             |
| 1848 | 1280.28                                | 1280.28                                             |
| 1849 | 1280.31                                | 1280.31                                             |
| 1850 | 1280.33                                | 1280.33                                             |
| 1851 | 1280.56                                | 1280.56                                             |
| 1852 | 1280.89                                | 1280.91                                             |
| 1853 | 1281.38                                | 1281.41                                             |
| 1854 | 1281.28                                | 1281.33                                             |
| 1855 | 1281.33                                | 1281.40                                             |
| 1856 | 1281.29                                | 1281.39                                             |
| 1857 | 1281.07                                | 1281.21                                             |
| 1858 | 1280.80                                | 1280.97                                             |
| 1859 | 1280.48                                | 1280.70                                             |
| 1860 | 1280.31                                | 1280.58                                             |
| 1861 | 1280.24                                | 1280.54                                             |
| 1862 | 1280.88                                | 1281.22                                             |
| 1863 | 1280.89                                | 1281.29                                             |
| 1864 | 1281.38                                | 1281.78                                             |
| 1865 | 1281.71                                | 1282.12                                             |
| 1866 | 1282.19                                | 1282.59                                             |
| 1867 | 1282.61                                | 1283.03                                             |
| 1868 | 1283.10                                | 1283.55                                             |
| 1869 | 1283.35                                | 1283.83                                             |
| 1870 | 1283.19                                | 1283.73                                             |
| 1871 | 1283.19                                | 1283.77                                             |
| 1872 | 1283.51                                | 1284.12                                             |
| 1873 | 1283.53                                | 1284.17                                             |
| 1874 | 1283.36                                | 1284.05                                             |
| 1875 | 1282.96                                | 1283.72                                             |
| 1876 | 1283.15                                | 1283.93                                             |
| 1877 | 1283.16                                | 1284.00                                             |
| 1878 | 1282.85                                | 1283.74                                             |
| 1879 | 1282.21                                | 1283.20                                             |
| 1880 | 1281.92                                | 1282.94                                             |
| 1881 | 1281.86                                | 1282.88                                             |
| 1882 | 1281.77                                | 1282.79                                             |
| 1883 | 1281.50                                | 1282.56                                             |
| 1884 | 1281.64                                | 1282.69                                             |
| 1885 | 1282.13                                | 1283.13                                             |

**Data for Figure 3c.** Measured elevations in Gilbert Bay (data of U.S. Geological Survey) of Great Salt Lake and estimated natural lake elevations in the absence of water use for human consumption.

| <b>Year</b> | <b>Observed elevations in Gilbert Bay (m)</b> | <b>Modeled natural lake elevations for Gilbert Bay (m)</b> |
|-------------|-----------------------------------------------|------------------------------------------------------------|
| 1886        | 1282.31                                       | 1283.33                                                    |
| 1887        | 1282.16                                       | 1283.23                                                    |
| 1888        | 1281.76                                       | 1282.90                                                    |
| 1889        | 1281.27                                       | 1282.48                                                    |
| 1890        | 1281.12                                       | 1282.37                                                    |
| 1891        | 1281.03                                       | 1282.32                                                    |
| 1892        | 1280.84                                       | 1282.19                                                    |
| 1893        | 1280.81                                       | 1282.20                                                    |
| 1894        | 1280.80                                       | 1282.23                                                    |
| 1895        | 1280.60                                       | 1282.11                                                    |
| 1896        | 1280.49                                       | 1282.04                                                    |
| 1897        | 1280.55                                       | 1282.14                                                    |
| 1898        | 1280.46                                       | 1282.10                                                    |
| 1899        | 1280.32                                       | 1282.03                                                    |
| 1900        | 1280.24                                       | 1282.01                                                    |
| 1901        | 1279.92                                       | 1281.77                                                    |
| 1902        | 1279.32                                       | 1281.29                                                    |
| 1903        | 1279.22                                       | 1281.19                                                    |
| 1904        | 1279.34                                       | 1281.28                                                    |
| 1905        | 1279.19                                       | 1281.15                                                    |
| 1906        | 1279.29                                       | 1281.22                                                    |
| 1907        | 1279.97                                       | 1281.85                                                    |
| 1908        | 1280.29                                       | 1282.20                                                    |
| 1909        | 1280.70                                       | 1282.60                                                    |
| 1910        | 1281.05                                       | 1282.92                                                    |
| 1911        | 1280.90                                       | 1282.82                                                    |
| 1912        | 1280.81                                       | 1282.78                                                    |
| 1913        | 1280.86                                       | 1282.85                                                    |
| 1914        | 1281.00                                       | 1282.99                                                    |
| 1915        | 1280.90                                       | 1282.94                                                    |
| 1916        | 1280.76                                       | 1282.86                                                    |
| 1917        | 1280.92                                       | 1283.01                                                    |
| 1918        | 1281.01                                       | 1283.12                                                    |
| 1919        | 1280.71                                       | 1282.91                                                    |
| 1920        | 1280.55                                       | 1282.80                                                    |
| 1921        | 1280.84                                       | 1283.05                                                    |
| 1922        | 1281.18                                       | 1283.34                                                    |
| 1923        | 1281.41                                       | 1283.54                                                    |
| 1924        | 1281.41                                       | 1283.55                                                    |
| 1925        | 1281.30                                       | 1283.48                                                    |
| 1926        | 1281.20                                       | 1283.42                                                    |

**Data for Figure 3c.** Measured elevations in Gilbert Bay (data of U.S. Geological Survey) of Great Salt Lake and estimated natural lake elevations in the absence of water use for human consumption.

| <b>Year</b> | <b>Observed elevations in Gilbert Bay (m)</b> | <b>Modeled natural lake elevations for Gilbert Bay (m)</b> |
|-------------|-----------------------------------------------|------------------------------------------------------------|
| 1927        | 1280.97                                       | 1283.25                                                    |
| 1928        | 1280.70                                       | 1283.04                                                    |
| 1929        | 1280.50                                       | 1282.89                                                    |
| 1930        | 1280.33                                       | 1282.75                                                    |
| 1931        | 1279.98                                       | 1282.50                                                    |
| 1932        | 1279.71                                       | 1282.28                                                    |
| 1933        | 1279.51                                       | 1282.11                                                    |
| 1934        | 1279.00                                       | 1281.68                                                    |
| 1935        | 1278.66                                       | 1281.33                                                    |
| 1936        | 1278.61                                       | 1281.18                                                    |
| 1937        | 1278.78                                       | 1281.23                                                    |
| 1938        | 1278.82                                       | 1281.22                                                    |
| 1939        | 1278.80                                       | 1281.17                                                    |
| 1940        | 1278.55                                       | 1280.95                                                    |
| 1941        | 1278.58                                       | 1280.87                                                    |
| 1942        | 1278.78                                       | 1280.97                                                    |
| 1943        | 1278.77                                       | 1280.96                                                    |
| 1944        | 1278.80                                       | 1280.98                                                    |
| 1945        | 1278.82                                       | 1280.98                                                    |
| 1946        | 1279.02                                       | 1281.15                                                    |
| 1947        | 1279.14                                       | 1281.29                                                    |
| 1948        | 1279.23                                       | 1281.41                                                    |
| 1949        | 1279.33                                       | 1281.55                                                    |
| 1950        | 1279.54                                       | 1281.78                                                    |
| 1951        | 1279.83                                       | 1282.09                                                    |
| 1952        | 1280.12                                       | 1282.40                                                    |
| 1953        | 1280.10                                       | 1282.45                                                    |
| 1954        | 1279.69                                       | 1282.19                                                    |
| 1955        | 1279.34                                       | 1281.93                                                    |
| 1956        | 1279.24                                       | 1281.87                                                    |
| 1957        | 1279.11                                       | 1281.77                                                    |
| 1958        | 1279.05                                       | 1281.73                                                    |
| 1959        | 1278.74                                       | 1281.49                                                    |
| 1960        | 1278.37                                       | 1281.20                                                    |
| 1961        | 1277.96                                       | 1280.91                                                    |
| 1962        | 1277.95                                       | 1280.83                                                    |
| 1963        | 1277.76                                       | 1280.68                                                    |
| 1964        | 1277.96                                       | 1280.77                                                    |
| 1965        | 1278.28                                       | 1280.92                                                    |
| 1966        | 1278.47                                       | 1281.14                                                    |
| 1967        | 1278.37                                       | 1281.17                                                    |



**Data for Figure 3c.** Measured elevations in Gilbert Bay (data of U.S. Geological Survey) of Great Salt Lake and estimated natural lake elevations in the absence of water use for human consumption.

| <b>Year</b> | <b>Observed elevations in Gilbert Bay<br/>(m)</b> | <b>Modeled natural lake elevations for<br/>Gilbert Bay (m)</b> |
|-------------|---------------------------------------------------|----------------------------------------------------------------|
| 1968        | 1278.57                                           | 1281.36                                                        |
| 1969        | 1278.94                                           | 1281.67                                                        |
| 1970        | 1278.88                                           | 1281.69                                                        |
| 1971        | 1279.29                                           | 1282.06                                                        |
| 1972        | 1279.73                                           | 1282.45                                                        |
| 1973        | 1280.03                                           | 1282.72                                                        |
| 1974        | 1280.20                                           | 1282.88                                                        |
| 1975        | 1280.30                                           | 1282.99                                                        |
| 1976        | 1280.50                                           | 1283.18                                                        |
| 1977        | 1280.12                                           | 1282.91                                                        |
| 1978        | 1279.92                                           | 1282.81                                                        |
| 1979        | 1279.77                                           | 1282.72                                                        |
| 1980        | 1279.93                                           | 1282.87                                                        |
| 1981        | 1279.95                                           | 1282.91                                                        |
| 1982        | 1280.16                                           | 1283.12                                                        |
| 1983        | 1281.31                                           | 1284.04                                                        |
| 1984        | 1282.52                                           | 1284.84                                                        |
| 1985        | 1282.87                                           | 1284.91                                                        |
| 1986        | 1283.34                                           | 1285.05                                                        |
| 1987        | 1283.31                                           | 1284.97                                                        |
| 1988        | 1282.54                                           | 1284.57                                                        |
| 1989        | 1281.38                                           | 1283.78                                                        |
| 1990        | 1281.04                                           | 1283.56                                                        |
| 1991        | 1280.59                                           | 1283.27                                                        |
| 1992        | 1280.17                                           | 1283.01                                                        |
| 1993        | 1280.14                                           | 1283.01                                                        |
| 1994        | 1279.85                                           | 1282.74                                                        |
| 1995        | 1279.86                                           | 1282.74                                                        |
| 1996        | 1279.95                                           | 1282.77                                                        |
| 1997        | 1280.27                                           | 1283.00                                                        |
| 1998        | 1280.80                                           | 1283.36                                                        |
| 1999        | 1281.08                                           | 1283.56                                                        |
| 2000        | 1280.83                                           | 1283.40                                                        |
| 2001        | 1280.27                                           | 1283.09                                                        |
| 2002        | 1279.72                                           | 1282.78                                                        |
| 2003        | 1279.13                                           | 1282.41                                                        |
| 2004        | 1278.69                                           | 1282.15                                                        |
| 2005        | 1278.93                                           | 1282.25                                                        |
| 2006        | 1279.22                                           | 1282.36                                                        |
| 2007        | 1279.05                                           | 1282.27                                                        |
| 2008        | 1278.66                                           | 1282.04                                                        |

**Data for Figure 3c.** Measured elevations in Gilbert Bay (data of U.S. Geological Survey) of Great Salt Lake and estimated natural lake elevations in the absence of water use for human consumption.

---

| <b>Year</b> | <b>Observed elevations in Gilbert Bay<br/>(m)</b> | <b>Modeled natural lake elevations for<br/>Gilbert Bay (m)</b> |
|-------------|---------------------------------------------------|----------------------------------------------------------------|
| 2009        | 1278.63                                           | 1281.98                                                        |
| 2010        | 1278.54                                           | 1281.91                                                        |
| 2011        | 1279.25                                           | 1282.39                                                        |
| 2012        | 1279.39                                           | 1282.47                                                        |
| 2013        | 1278.83                                           | 1282.13                                                        |
| 2014        | 1278.41                                           | 1281.87                                                        |
| 2015        | 1278.21                                           | 1281.78                                                        |

---

## Decline of the world's saline lakes

**Figure 5 data**, showing the current areas of three lakes, the target areas when the desired elevation is reached, and the river inflow necessary to sustain evaporation from that lake area. Annual climatic variations would cause considerable variation in the areas and inflows of the lake. The data thus represent a quasi-equilibrium mean status.

| System                | Current Area<br>(km <sup>2</sup> ) | Target Area<br>(km <sup>2</sup> ) | Target<br>elevation<br>(m) | Current<br>mean river<br>inflow | Target<br>mean river<br>inflow | Increase in<br>flows<br>needed |
|-----------------------|------------------------------------|-----------------------------------|----------------------------|---------------------------------|--------------------------------|--------------------------------|
| Great Salt Lake (USA) | 2175                               | 4349                              | 1280                       | 3.50                            | 4.53                           | 29%                            |
| Urmia (Iran)          | 1000                               | 4500                              | 1274                       | 2.31                            | 4.23                           | 83%                            |
| Walker Lake (USA)     | 80                                 | 130                               | 1205                       | 0.136                           | 0.168                          | 24%                            |

## Decline of the World's saline lakes

**Methods Section.** Supplementary data Table 1, showing the estimated areas of agricultural use for different crops in the Great Salt Lake Basin during the last 30 years, and the mean, minimum and maximum estimated water usage in different parts of the basin. These data were used to estimate the agricultural water depletion in the basin shown in Figure 3b.

|         | <b>Alfalfa</b>                                                  | <b>Pasture</b> | <b>Hay</b> | <b>Grain</b> | <b>Corn</b> |
|---------|-----------------------------------------------------------------|----------------|------------|--------------|-------------|
|         | <b>Area (km<sup>2</sup>)</b>                                    |                |            |              |             |
|         | 2666                                                            | 2527           | 1364       | 1379         | 418         |
|         | <b>Water consumption for each crop type (m yr<sup>-1</sup>)</b> |                |            |              |             |
| Mean    | 0.75                                                            | 0.57           | 0.70       | 0.54         | 0.49        |
| Minimum | 0.27                                                            | 0.14           | 0.24       | 0.08         | 0.13        |
| Maximum | 0.99                                                            | 0.74           | 0.91       | 0.63         | 0.66        |
